# Supplementary material for: Strategies to Promote Effective Student Research Teams in Undergraduate Biology Labs
Source: Oxford University Press journal article supplement (doi:10.1525/abt.2020.82.1.18), 2019-12-31
Supplement: abt.2020.82.1.18-f3.docx [file abt.2020.82.1.18-f3.docx]

**Appendix 3: Pre- and Post-Semester Survey Instrument**

**Survey directions**

Please answer the questions as honestly and accurately as you can, without using any sources or talking with anyone else about the answers. For multiple response questions, please circle or underline the response that you most identify with (or that most closely matches your feelings). For open-ended questions, please use the space provided to record your answers and write legibly. If you don't know the answer to any part of an open-ended question, provide a "?" in that area indicating this fact.

**Teamwork**

1. I believe that working in a team of 3-5 students is an effective method of learning science.

Totally disagree

Somewhat disagree

Neither agree nor disagree

Somewhat agree

Totally agree

2. I believe that the work resulting from a team of 3-5 students is better than that of 1 student working independently.

Totally disagree

Somewhat disagree

Neither agree nor disagree

Somewhat agree

Totally agree

3. I believe that the work resulting from a team of 3-5 students with different perspectives, skills, and knowledge is better than that of a team of 3-5 students with similar perspectives, skills, and knowledge.

Totally disagree

Somewhat disagree

Neither agree nor disagree

Somewhat agree

Totally agree

4. I believe that the abilities and skills to work effectively in a team of 3-5 students (such as: team building, communication, leadership) can be gained by training and practice.

Totally disagree

Somewhat disagree

Neither agree nor disagree

Somewhat agree

Totally agree

5. I believe that the abilities and skills to work effectively in a team of 3-5 students (such as: team building, communication, leadership) are important for post-graduate success in the sciences.

Totally disagree

Somewhat disagree

Neither agree nor disagree

Somewhat agree

Totally agree

6A. I have had previous formal training in teamwork skills such as team building, communication, or leadership training.

Yes

No

6B. If YES, what type and in what context?

7. In 2-4 sentences, tell me in what ways you think working in a team of 3-5 students might enhance or impede your scientific learning?

**Appendix 3: Post-Semester Survey**

**Teamwork**

1. I believe that working in a team of 3-5 students is an effective method of learning science.

Totally disagree

Somewhat disagree

Neither agree nor disagree

Somewhat agree

Totally agree

2. I believe that the work resulting from a team of 3-5 students is better than that of 1 student working independently.

Totally disagree

Somewhat disagree

Neither agree nor disagree

Somewhat agree

Totally agree

3. I believe that the work resulting from a team of 3-5 students with different perspectives, skills, and knowledge is better than that of a team of 3-5 students with similar perspectives, skills, and knowledge.

Totally disagree

Somewhat disagree

Neither agree nor disagree

Somewhat agree

Totally agree

4. I believe that the abilities and skills to work effectively in a team of 3-5 students (such as: team building, communication, leadership) can be gained by training and practice.

Totally disagree

Somewhat disagree

Neither agree nor disagree

Somewhat agree

Totally agree

5. I believe that the abilities and skills to work effectively in a team of 3-5 students (such as: team building, communication, leadership) are important for post-graduate success in the sciences.

Totally disagree

Somewhat disagree

Neither agree nor disagree

Somewhat agree

Totally agree

6. I believe that the teamwork skills I learned during the early part of the semester improved my team's performance. Examples of skills: team building, communication skills, characteristics of effective teams, how I (and my team mates) deal with conflict.

Totally disagree

Somewhat disagree

Neither agree nor disagree

Somewhat agree

Totally agree

7A. I believe that the teamwork assessment survey(s) (CATME #Week 6 and # Week 10), my individual reflection about the survey results (Exercise 5 teamwork reflection homework), and my team's reflection on the survey results (Exercise 6 teamwork reflection in lab) improved my team's performance. IMPORTANT: If you didn't complete all of Exercise 5 teamwork reflection, please choose one of the first 5 answers about your individual experience AND circle the last option.

Totally disagree

Somewhat disagree

Neither agree nor disagree

Somewhat agree

Totally agree

I didn’t complete all of Exercise 5 teamwork reflection.

7B. In what specific ways do you think that working in a team of 3-5 students either enhanced or impeded (or both) your scientific learning? Please tell me in 3-5 sentences.
